# Supplementary material for: The common mouse protozoa Tritrichomonas muris alters mucosal T cell homeostasis and colitis susceptibility
Source: PubMed Central journal article supplement — J Exp Med. 2016 Dec 12;213(13):2841–50. doi: 10.1084/jem.20161776 (PMC5154950; doi:10.1084/jem.20161776), 2016-12-12
Supplement: JEM_20161776_sm.pdf [file JEM_20161776_sm.pdf]

SUPPLEMENTAL MATERIAL

Escalante et al., <https://doi.org/10.1084/jem.20161776>

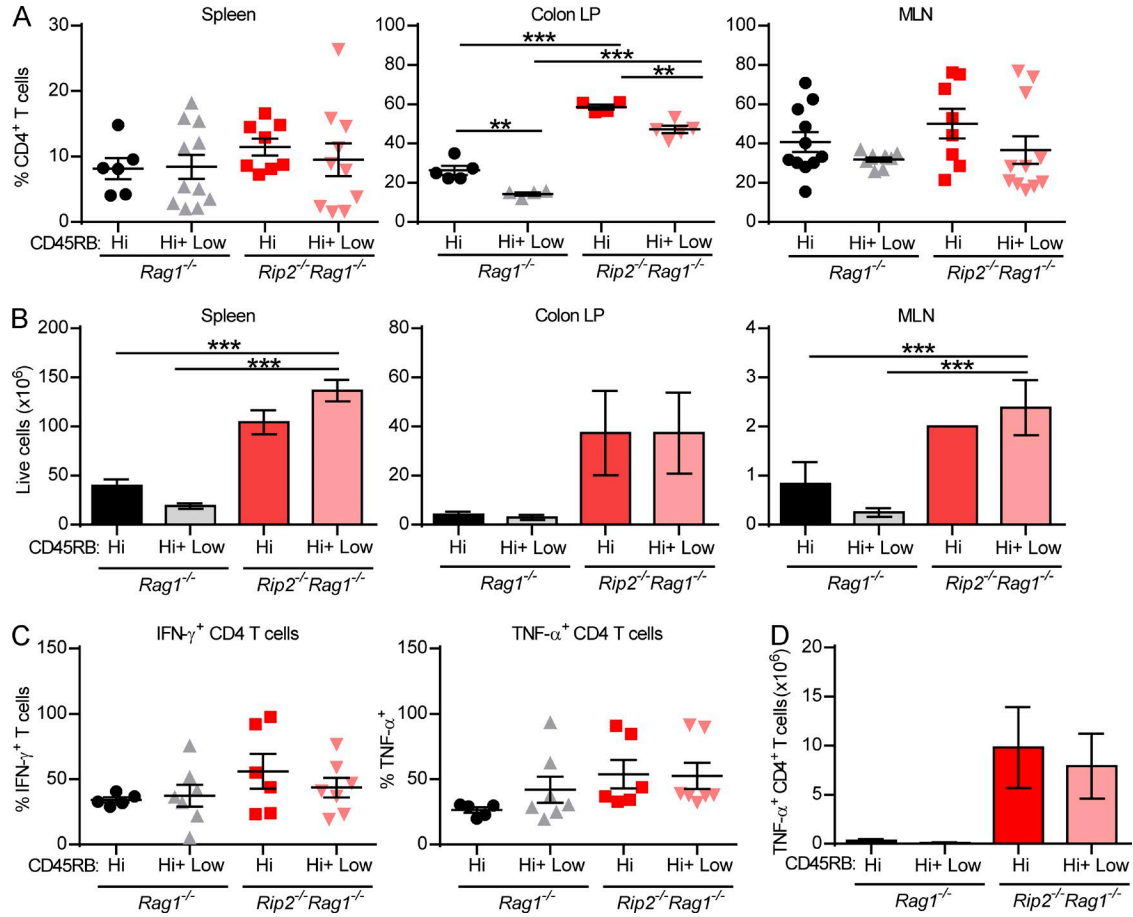

Figure S1. *Rip2<sup>-/-</sup> Rag1<sup>-/-</sup>* mice are not protected from pathology by regulatory CD45RB<sup>Low</sup> T cells. Nonlittermate *Rip2<sup>-/-</sup> Rag1<sup>-/-</sup>* and *Rag1<sup>-/-</sup>* mice were injected i.p. with  $0.5 \times 10^6$  CD45RB<sup>High</sup> with or without  $0.25 \times 10^6$  CD45RB<sup>Low</sup> CD4 T cells and sacrificed at week 4. (A and B) Spleen, colon LP, and MLNs were harvested, and isolated cells were quantified by flow cytometry. (C and D) Colon LP cells were restimulated with plate-bound anti-CD3/anti-CD28 antibody before cytokine analysis by flow cytometry. Data from two experiments were pooled with 4–12 mice per group. Mean  $\pm$  SEM is shown with \*\*,  $P \leq 0.01$ ; \*\*\*,  $P \leq 0.001$  using a one-way ANOVA and Tukey's post-hoc analysis.

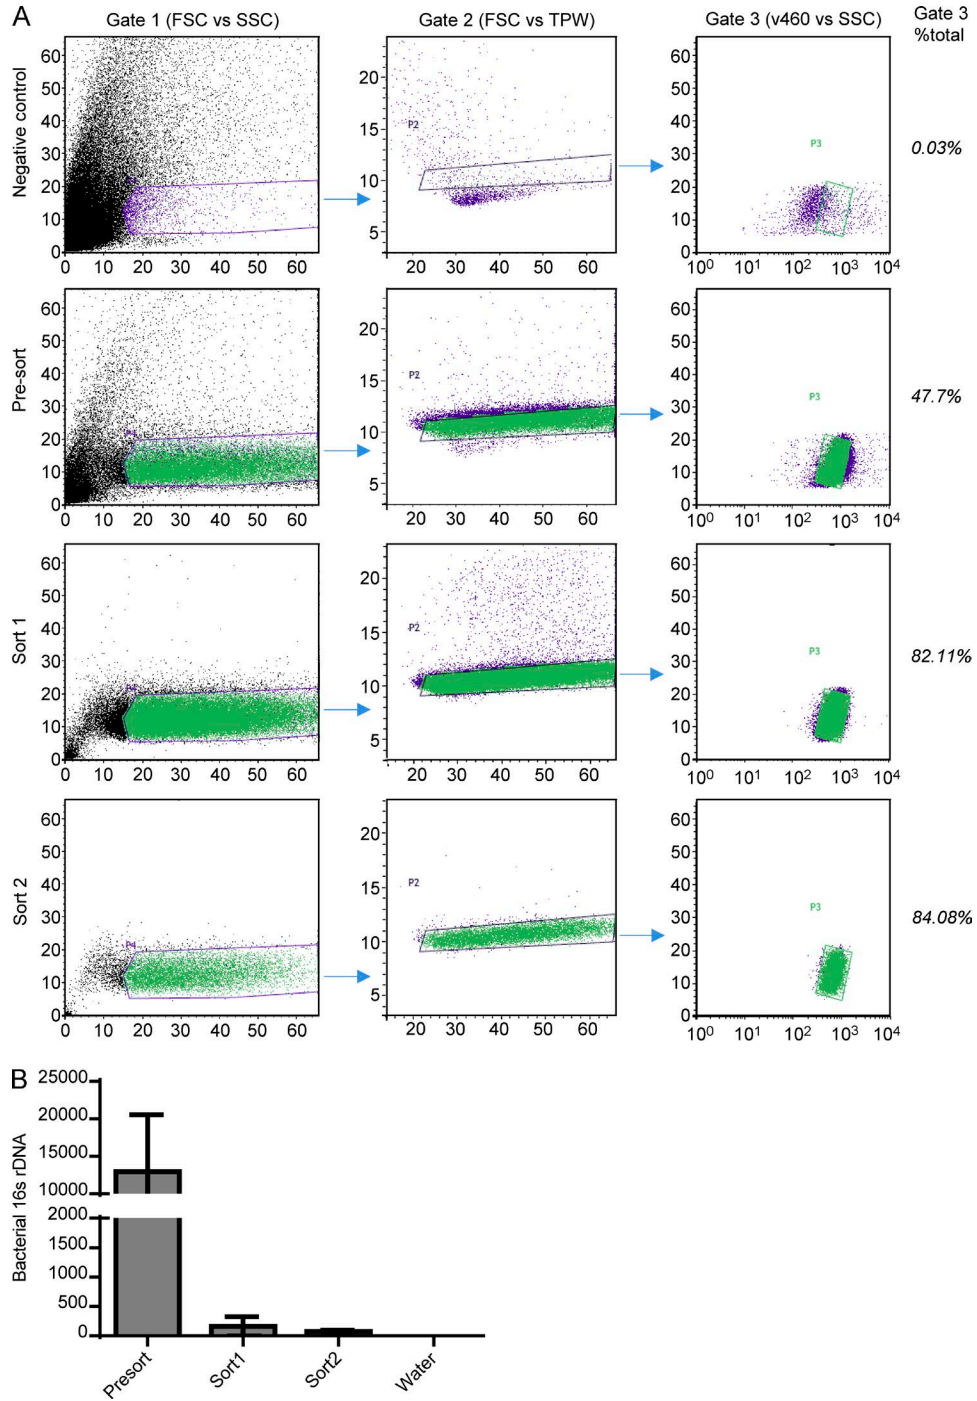

Figure S2. **Sorting strategy for *T. muris*.** (A) Filtered and washed protozoa were double FACS sorted based on size, granularity, and violet autofluorescence. FSC, forward scatter; SSC, side scatter; TPW, trigger pulse width. *T. muris*-negative, unsorted *T. muris*-positive, post-sort 1, and post-sort 2 samples were visualized for purity by flow cytometry. (B) Sort sample Eubacteria 16s rDNA relative to water was quantified by qPCR. Data are one representative experiment. Mean  $\pm$  SEM is shown.
